# Supplementary material for: A Phase 1 Randomized Placebo-Controlled Study to Assess the Safety, Immunogenicity and Genetic Stability of a New Potential Pandemic H7N9 Live Attenuated Influenza Vaccine in Healthy Adults
Source: Vaccines (Basel). 2020 Jun 10;8(2):296. doi: 10.3390/vaccines8020296 (PMC7350028; doi:10.3390/vaccines8020296)
Supplement: Supplementary file 1 [file vaccines-08-00296-s001.zip › Supplementary Figure S1.pdf]

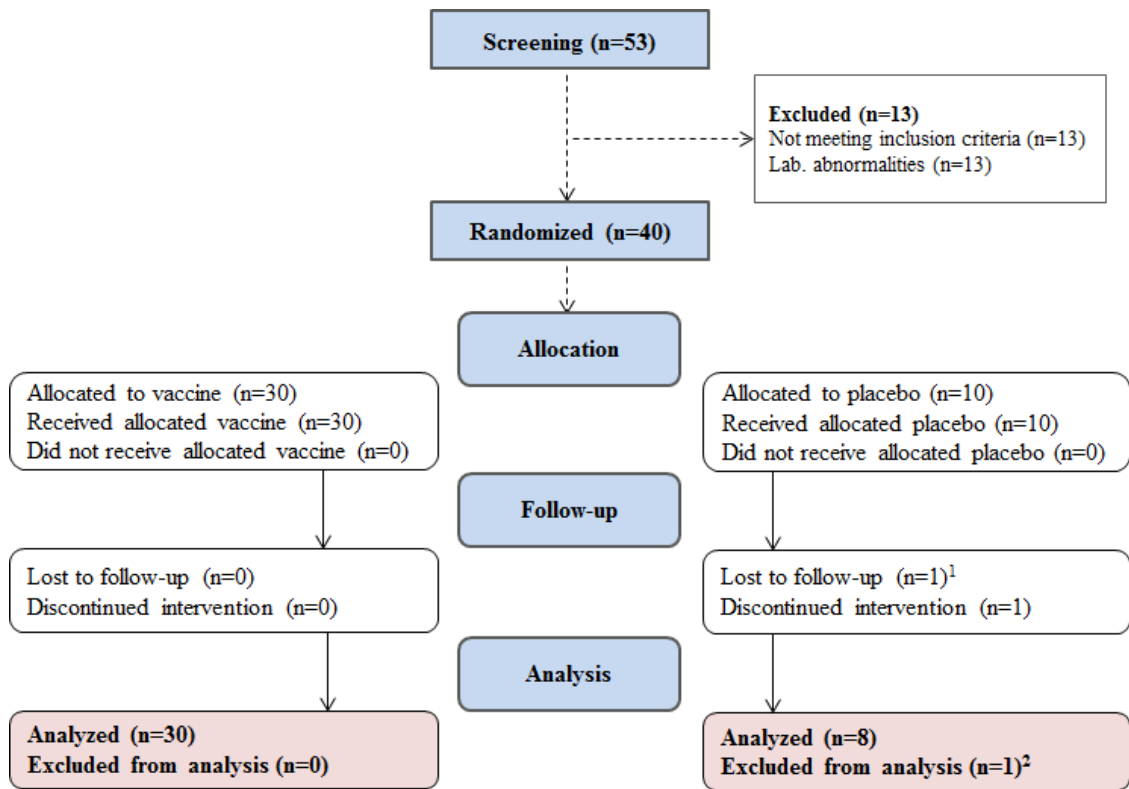

**Figure S1.** Subject disposition flow diagram. <sup>1</sup>One subject who received the first dose of placebo did not receive the second dose. The subject, a 33-year-old male had increased temperature, cough, headache, fever and rhinitis on day 24. <sup>2</sup>One subject was inadvertently included in the trial, randomized and administered two doses of study placebo. This volunteer was over 50 years old. According to the Protocol ID Number LAIV-H7N9-02, this subject was excluded from the analysis.
