# Supplementary material for: A Phase 1 Randomized Placebo-Controlled Study to Assess the Safety, Immunogenicity and Genetic Stability of a New Potential Pandemic H7N9 Live Attenuated Influenza Vaccine in Healthy Adults
Source: Vaccines (Basel). 2020 Jun 10;8(2):296. doi: 10.3390/vaccines8020296 (PMC7350028; doi:10.3390/vaccines8020296)
Supplement: Supplementary file 1 [file vaccines-08-00296-s001.zip › Supplementary Table S1.pdf]

**Table S1.** Solicited local and systemic adverse reactions in the six days after vaccination or revaccination

| Group                          | Volunteer ID | Adverse reactions       | Day of the study                    |
|--------------------------------|--------------|-------------------------|-------------------------------------|
| Adverse reactions after dose 1 |              |                         |                                     |
| Vaccine                        | 1            | Body temp 37.0 °C       | Day 2 (evening) – Day 3 (morning)   |
|                                |              | Malaise                 | Day 2 (evening) – Day 3 (morning)   |
|                                |              | Fatigue                 | Day 2 (evening) – Day 3 (morning)   |
| Vaccine                        | 2            | Body temp 37.1 °C       | Day 2 – Day 4                       |
|                                |              | Body temp 37.2 °C       | Day 4 – Day 6                       |
|                                |              | Nasal congestion        | Day 4 – Day 6                       |
| Adverse reactions after dose 2 |              |                         |                                     |
| Vaccine                        | 4            | Nasal congestion        | Day 28 – Day 29                     |
| Placebo                        | 5            | Body temp 37.5 °C       | Day 30 (evening) – Day 31 (morning) |
| Placebo                        | 6            | Herpes zoster           | Day 30 – Day 34                     |
| Placebo                        | 7            | Cough                   | Day 31 – Day 31 (evening)           |
|                                |              | Sore throat             | Day 31 – Day 31 (evening)           |
|                                |              | Hyperemia arches throat | Day 31 – Day 31 (evening)           |
