# Supplementary material for: A Phase 1 Randomized Placebo-Controlled Study to Assess the Safety, Immunogenicity and Genetic Stability of a New Potential Pandemic H7N9 Live Attenuated Influenza Vaccine in Healthy Adults
Source: Vaccines (Basel). 2020 Jun 10;8(2):296. doi: 10.3390/vaccines8020296 (PMC7350028; doi:10.3390/vaccines8020296)
Supplement: Supplementary file 1 [file vaccines-08-00296-s001.zip › Supplementary Table S2.pdf]

**Table S2.** Laboratory abnormalities in the six days after vaccination or revaccination

| Laboratory abnormality               | Worst grade | Group          |           |               |           |
|--------------------------------------|-------------|----------------|-----------|---------------|-----------|
|                                      |             | Vaccine (n=30) |           | Placebo (n=8) |           |
|                                      |             | n² (%)         | 95% CI    | n² (%)        | 95% CI    |
| Dose 1                               |             |                |           |               |           |
| Any laboratory abnormalities¹        | mild        | 13 (43.3)      | 27.4–60.8 | 7 (87.5)      | 52.9–97.8 |
| Blood chemistry                      |             |                |           |               |           |
| Alanine aminotransferase increased   | mild        | 5 (16.7)       | 7.3–33.6  | 1 (12.5)      | 2.2–47.1  |
| Alkaline phosphatase increased       | mild        | 1 (3.3)        | 0.6–16.7  | 0             | 0         |
| Hematology                           |             |                |           |               |           |
| Leukocyte count increased            | mild        | 5 (16.7)       | 7.3–33.6  | 2 (25.0)      | 7.1–59.1  |
| Leukocyte count decreased            | mild        | 1 (3.3)        | 0.6–16.7  | 2 (25.0)      | 7.1–59.1  |
| Lymphocyte count increased           | mild        | 5 (16.7)       | 7.3–33.6  | 2 (25.0)      | 7.1–59.1  |
| Lymphocyte count decreased           | mild        | 1 (3.3)        | 0.6–16.7  | 0             | 0         |
| Neutrophil count increased           | mild        | 3 (10.0)       | 3.5–25.6  | 2 (25.0)      | 7.1–59.1  |
| Thrombocyte count increased          | mild        | 0              | 0         | 1 (12.5)      | 2.2–47.1  |
| Erythrocyte count increased          | mild        | 0              | 0         | 1 (12.5)      | 2.2–47.1  |
| Worst grade (total)                  |             | mild (n=21)    |           | mild (n=11)   |           |
| Any serious adverse event            |             | none           |           | None          |           |
| Dose 2                               |             |                |           |               |           |
| Any laboratory abnormalities¹        | mild        | 9 (30.0)       | 16.7–47.9 | 3 (37.5)      | 13.7–69.4 |
| Blood chemistry                      |             |                |           |               |           |
| Blood bilirubin increased            | mild        | 1 (3.3)        | 0.6–16.7  | 1 (12.5)      | 2.2–47.1  |
| Alanine aminotransferase increased   | mild        | 4 (13.3)       | 5.3–29.7  | 0             | 0         |
| Glucose increased                    | mild        | 0              | 0         | 1 (12.5)      | 2.2–47.1  |
| Aspartate aminotransferase increased | mild        | 1 (3.3)        | 0.6–16.7  | 0             | 0         |
| Hematology                           |             |                |           |               |           |
| Leukocyte count increased            | mild        | 4 (13.3)       | 5.3–29.7  | 2 (25.0)      | 7.1–59.1  |
| Leukocyte count decreased            | mild        | 0              | 0         | 2 (25.0)      | 7.1–59.1  |
| Eosinophil count increased           | mild        | 0              | 0         | 1 (12.5)      | 2.2–47.1  |
| Lymphocyte count increased           | mild        | 4 (13.3)       | 5.3–29.7  | 2 (25.0)      | 7.1–59.1  |
| Lymphocyte count decreased           | mild        | 2 (6.7)        | 1.8–21.3  | 1 (12.5)      | 2.2–47.1  |
| Neutrophil count decreased           | mild        | 3 (10.0)       | 3.5–25.6  | 1 (12.5)      | 2.2–47.1  |
| Worst grade (total)                  |             | mild (n=19)    |           | mild (n=11)   |           |
| Any serious adverse event            |             | none           |           | none          |           |

<sup>1</sup>A subject with more than one abnormal result in a specific category was counted only once. <sup>2</sup>Severity was quantified as follows: none – lack of sign or symptom, normal; mild – events require minimal or no treatment and do not interfere with the subject's daily activities; moderate – events result in a low level of inconvenience or concern to the subject with therapeutic measures; severe – events interrupt the subject's functioning and might require systemic drug therapy or other treatment. <sup>3</sup>Percentages based on total number of subjects in each treatment group.
