# Supplementary material for: A Phase 1 Randomized Placebo-Controlled Study to Assess the Safety, Immunogenicity and Genetic Stability of a New Potential Pandemic H7N9 Live Attenuated Influenza Vaccine in Healthy Adults
Source: Vaccines (Basel). 2020 Jun 10;8(2):296. doi: 10.3390/vaccines8020296 (PMC7350028; doi:10.3390/vaccines8020296)
Supplement: Supplementary file 1 [file vaccines-08-00296-s001.zip › Supplementary Table S3.pdf]

**Table S3.** Results of RT–PCR testing of volunteers’ nasal swabs after immunization with A/17/Hong Kong/2017/75108 (H7N9) LAIV and detection of vaccine virus by culturing nasal swabs in embryonated chicken eggs

| Preparation | Volunteer<br>ID<br>Number | Vaccination |      |     |      |     |      |     |      |     |     | Revaccination |      |        |      |        |      |        |      |
|-------------|---------------------------|-------------|------|-----|------|-----|------|-----|------|-----|-----|---------------|------|--------|------|--------|------|--------|------|
|             |                           | D1          |      | D2  |      | D3  |      | D4  |      | D5  | D6  | D1(29)        |      | D2(30) |      | D3(31) |      | D4(32) |      |
|             |                           | PCR         | Eggs | PCR | Eggs | PCR | Eggs | PCR | Eggs | PCR | PCR | PCR           | Eggs | PCR    | Eggs | PCR    | Eggs | PCR    | Eggs |
| Vaccine     | 002                       | 0           | 0    | 0   | 0    | 0   | 0    | 0   | 0    | 0   | 0   | +             | 0    | +      | +    | +      | +    | +      | +    |
| Vaccine     | 003                       | +           | +    | 0   | 0    | 0   | 0    | 0   | 0    | 0   | 0   | 0             | 0    | 0      | 0    | 0      | 0    | 0      | 0    |
| Vaccine     | 004                       | +           | 0    | 0   | 0    | 0   | 0    | 0   | 0    | 0   | 0   | 0             | 0    | 0      | 0    | 0      | 0    | 0      | 0    |
| Vaccine     | 006                       | +           | 0    | 0   | 0    | 0   | 0    | 0   | 0    | 0   | 0   | 0             | 0    | 0      | 0    | 0      | 0    | 0      | 0    |
| Vaccine     | 007                       | +           | 0    | 0   | 0    | 0   | 0    | 0   | 0    | 0   | 0   | 0             | 0    | 0      | 0    | 0      | 0    | 0      | 0    |
| Vaccine     | 009                       | +           | 0    | 0   | 0    | 0   | 0    | 0   | 0    | 0   | 0   | 0             | 0    | 0      | 0    | 0      | 0    | 0      | 0    |
| Vaccine     | 010                       | +           | 0    | 0   | +    | 0   | 0    | 0   | 0    | 0   | 0   | 0             | 0    | 0      | 0    | 0      | 0    | 0      | 0    |
| Vaccine     | 012                       | +           | 0    | +   | 0    | 0   | 0    | 0   | 0    | 0   | 0   | 0             | 0    | 0      | 0    | 0      | 0    | 0      | 0    |
| Vaccine     | 013                       | +           | 0    | 0   | 0    | 0   | 0    | 0   | 0    | 0   | 0   | 0             | 0    | 0      | 0    | 0      | 0    | 0      | 0    |
| Vaccine     | 014                       | +           | +    | +   | +    | +   | +    | 0   | 0    | 0   | 0   | 0             | 0    | 0      | 0    | 0      | 0    | 0      | 0    |
| Vaccine     | 015                       | +           | 0    | 0   | 0    | 0   | 0    | 0   | 0    | 0   | 0   | 0             | 0    | 0      | 0    | 0      | 0    | 0      | 0    |
| Vaccine     | 016                       | +           | 0    | 0   | 0    | 0   | +    | +   | +    | 0   | 0   | 0             | 0    | 0      | 0    | 0      | 0    | 0      | 0    |
| Vaccine     | 018                       | +           | 0    | +   | 0    | +   | 0    | 0   | 0    | 0   | 0   | 0             | 0    | 0      | 0    | 0      | 0    | 0      | 0    |
| Vaccine     | 019                       | +           | +    | +   | +    | 0   | 0    | 0   | 0    | 0   | 0   | 0             | 0    | 0      | 0    | 0      | 0    | 0      | 0    |
| Vaccine     | 020                       | +           | +    | +   | 0    | 0   | 0    | 0   | 0    | 0   | 0   | 0             | 0    | 0      | 0    | 0      | 0    | 0      | 0    |
| Vaccine     | 021                       | 0           | 0    | 0   | 0    | 0   | 0    | 0   | 0    | 0   | 0   | 0             | 0    | 0      | 0    | 0      | 0    | 0      | 0    |
| Vaccine     | 022                       | +           | 0    | +   | +    | 0   | 0    | 0   | 0    | 0   | 0   | +             | 0    | 0      | 0    | 0      | 0    | 0      | 0    |
| Vaccine     | 024                       | +           | 0    | 0   | 0    | 0   | 0    | 0   | 0    | 0   | 0   | +             | 0    | 0      | 0    | 0      | 0    | 0      | 0    |
| Vaccine     | 025                       | +           | 0    | 0   | 0    | 0   | 0    | 0   | 0    | 0   | 0   | +             | 0    | 0      | 0    | 0      | 0    | 0      | 0    |
| Vaccine     | 027                       | +           | 0    | 0   | 0    | +   | 0    | 0   | 0    | 0   | 0   | +             | 0    | +      | +    | 0      | 0    | +      | +    |
| Vaccine     | 028                       | +           | 0    | 0   | 0    | 0   | +    | 0   | 0    | 0   | 0   | +             | 0    | +      | 0    | 0      | 0    | 0      | 0    |

| Preparation | Volunteer<br>ID<br>Number | Vaccination |      |     |      |     |      |     |      |     |     | Revaccination    |      |        |      |        |      |        |      |
|-------------|---------------------------|-------------|------|-----|------|-----|------|-----|------|-----|-----|------------------|------|--------|------|--------|------|--------|------|
|             |                           | D1          |      | D2  |      | D3  |      | D4  |      | D5  | D6  | D1(29)           |      | D2(30) |      | D3(31) |      | D4(32) |      |
|             |                           | PCR         | Eggs | PCR | Eggs | PCR | Eggs | PCR | Eggs | PCR | PCR | PCR              | Eggs | PCR    | Eggs | PCR    | Eggs | PCR    | Eggs |
| Vaccine     | 029                       | +           | 0    | +   | +    | +   | +    | +   | +    | 0   | 0   | 0                | 0    | 0      | 0    | 0      | 0    | 0      | 0    |
| Vaccine     | 030                       | 0           | 0    | 0   | 0    | 0   | 0    | 0   | 0    | 0   | 0   | 0                | 0    | 0      | 0    | 0      | 0    | 0      | 0    |
| Vaccine     | 032                       | +           | 0    | 0   | 0    | 0   | 0    | 0   | 0    | 0   | 0   | 0                | 0    | 0      | 0    | 0      | 0    | 0      | 0    |
| Vaccine     | 033                       | +           | 0    | 0   | 0    | 0   | 0    | 0   | 0    | 0   | 0   | 0                | 0    | 0      | 0    | 0      | 0    | 0      | 0    |
| Vaccine     | 035                       | +           | 0    | 0   | 0    | 0   | 0    | 0   | 0    | 0   | 0   | +                | 0    | +      | 0    | 0      | 0    | 0      | 0    |
| Vaccine     | 036                       | +           | +    | +   | 0    | +   | +    | 0   | 0    | 0   | 0   | 0                | 0    | 0      | 0    | 0      | 0    | 0      | 0    |
| Vaccine     | 037                       | +           | 0    | 0   | 0    | 0   | 0    | 0   | 0    | 0   | 0   | +                | 0    | 0      | 0    | 0      | 0    | 0      | 0    |
| Vaccine     | 039                       | +           | +    | 0   | 0    | 0   | 0    | +   | +    | +   | +   | +                | +    | 0      | 0    | 0      | 0    | 0      | 0    |
| Vaccine     | 040                       | +           | 0    | 0   | 0    | 0   | 0    | 0   | 0    | 0   | 0   | 0                | 0    | 0      | 0    | 0      | 0    | 0      | 0    |
| Placebo     | 001                       | 0           | 0    | 0   | 0    | 0   | 0    | 0   | 0    | 0   | 0   | 0                | 0    | 0      | 0    | 0      | 0    | 0      | 0    |
| Placebo     | 005                       | 0           | 0    | 0   | 0    | 0   | 0    | 0   | 0    | 0   | 0   | 0                | 0    | 0      | 0    | 0      | 0    | 0      | 0    |
| Placebo     | 008                       | 0           | 0    | 0   | 0    | 0   | 0    | 0   | 0    | 0   | 0   | 0                | 0    | 0      | 0    | 0      | 0    | 0      | 0    |
| Placebo     | 011                       | 0           | 0    | 0   | 0    | 0   | 0    | 0   | 0    | 0   | 0   | 0                | 0    | 0      | 0    | 0      | 0    | 0      | 0    |
| Placebo     | 017                       | 0           | 0    | 0   | 0    | 0   | 0    | 0   | 0    | 0   | 0   | 0                | 0    | 0      | 0    | 0      | 0    | 0      | 0    |
| Placebo     | 023                       | 0           | 0    | 0   | 0    | 0   | 0    | 0   | 0    | 0   | 0   | ARD <sup>1</sup> | ARD  | ARD    | ARD  | ARD    | ARD  | ARD    | ARD  |
| Placebo     | 026                       | 0           | 0    | 0   | 0    | 0   | 0    | 0   | 0    | 0   | 0   | 0                | 0    | 0      | 0    | 0      | 0    | 0      | 0    |
| Placebo     | 031                       | 0           | 0    | 0   | 0    | 0   | 0    | 0   | 0    | 0   | 0   | 0                | 0    | 0      | 0    | 0      | 0    | 0      | 0    |
| Placebo     | 034                       | 0           | 0    | 0   | 0    | 0   | 0    | 0   | 0    | 0   | 0   | 0                | 0    | 0      | 0    | 0      | 0    | 0      | 0    |
| Placebo     | 038                       | 0           | 0    | 0   | 0    | 0   | 0    | 0   | 0    | 0   | 0   | 0                | 0    | 0      | 0    | 0      | 0    | 0      | 0    |
| TOTAL       |                           | 27          | 6    | 8   | 5    | 5   | 5    | 3   | 3    | 1   | 1   | 9                | 1    | 4      | 2    | 1      | 1    | 2      | 2    |

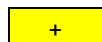

Detection of vaccine virus by culturing nasal swabs in eggs

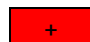

Detection of vaccine virus in nasal swabs by RT-PCR

<sup>1</sup>ARD – acute respiratory disease with no connection to influenza. The volunteer #023 was excluded from the trial.
