# Supplementary material for: A Phase 1 Randomized Placebo-Controlled Study to Assess the Safety, Immunogenicity and Genetic Stability of a New Potential Pandemic H7N9 Live Attenuated Influenza Vaccine in Healthy Adults
Source: Vaccines (Basel). 2020 Jun 10;8(2):296. doi: 10.3390/vaccines8020296 (PMC7350028; doi:10.3390/vaccines8020296)
Supplement: Supplementary file 1 [file vaccines-08-00296-s001.zip › Supplementary Table S4.pdf]

**Table S4.** Stability of attenuating mutations in internal genes of H7N9 LAIV clinical isolates

| Isolate number                      | Day | Gene of L17 MDV origin (attenuating mutation N't position) |     |      |     |      |    |     |     |
|-------------------------------------|-----|------------------------------------------------------------|-----|------|-----|------|----|-----|-----|
|                                     |     | PB2                                                        | PB1 |      | PA  |      | M  |     | NS  |
|                                     |     | 1459                                                       | 819 | 1795 | 107 | 1045 | 68 | 457 | 798 |
| Vaccine virus isolation post–Dose 1 |     |                                                            |     |      |     |      |    |     |     |
| 1                                   | 1   | +                                                          | +   | +    | +   | +    | +  | +   | +   |
| 2                                   | 1   | +                                                          | +   | +    | +   | +    | +  | +   | +   |
| 3                                   | 1   | +                                                          | +   | +    | +   | +    | +  | +   | +   |
| 4                                   | 1   | +                                                          | +   | +    | +   | +    | +  | +   | +   |
| 5                                   | 1   | +                                                          | +   | +    | +   | +    | +  | +   | +   |
| 6                                   | 1   | +                                                          | +   | +    | +   | +    | +  | +   | +   |
| 7                                   | 2   | +                                                          | +   | +    | +   | +    | +  | +   | +   |
| 8                                   | 2   | +                                                          | +   | +    | +   | +    | +  | +   | +   |
| 9                                   | 2   | +                                                          | +   | +    | +   | +    | +  | +   | +   |
| 10                                  | 2   | +                                                          | +   | +    | +   | +    | +  | +   | +   |
| 11                                  | 2   | +                                                          | +   | +    | +   | +    | +  | +   | +   |
| 12                                  | 3   | +                                                          | +   | +    | +   | +    | +  | +   | +   |
| 13                                  | 3   | +                                                          | +   | +    | +   | +    | +  | +   | +   |
| 14                                  | 3   | +                                                          | +   | +    | +   | +    | +  | +   | +   |
| 15                                  | 3   | +                                                          | +   | +    | +   | +    | +  | +   | +   |
| 16                                  | 3   | +                                                          | +   | +    | +   | +    | +  | +   | +   |
| 17                                  | 4   | +                                                          | +   | +    | +   | +    | +  | +   | +   |
| 18                                  | 4   | +                                                          | +   | +    | +   | +    | +  | +   | +   |
| 19                                  | 4   | +                                                          | +   | +    | +   | +    | +  | +   | +   |
| Vaccine virus isolation post–Dose 2 |     |                                                            |     |      |     |      |    |     |     |
| 20                                  | 29  | +                                                          | +   | +    | +   | +    | +  | +   | +   |
| 21                                  | 30  | +                                                          | +   | +    | +   | +    | +  | +   | +   |
| 22                                  | 30  | +                                                          | +   | +    | +   | +    | +  | +   | +   |
| 23                                  | 31  | +                                                          | +   | +    | +   | +    | +  | +   | +   |
| 24                                  | 32  | +                                                          | +   | +    | +   | +    | +  | +   | +   |
| 25                                  | 32  | +                                                          | +   | +    | +   | +    | +  | +   | +   |
| Control viruses                     |     |                                                            |     |      |     |      |    |     |     |
| H7N9 LAIV                           |     | +                                                          | +   | +    | +   | +    | +  | +   | +   |
| L17 MDV                             |     | +                                                          | +   | +    | +   | +    | +  | +   | +   |
| LWT <sup>2</sup>                    |     | –                                                          | –   | –    | –   | –    | –  | –   | –   |

<sup>1</sup>Day of isolation. <sup>2</sup>A/Leningrad/134/57 (H2N2) WT parent of L17 MDV
