# Supplementary material for: A Phase 1 Randomized Placebo-Controlled Study to Assess the Safety, Immunogenicity and Genetic Stability of a New Potential Pandemic H7N9 Live Attenuated Influenza Vaccine in Healthy Adults
Source: Vaccines (Basel). 2020 Jun 10;8(2):296. doi: 10.3390/vaccines8020296 (PMC7350028; doi:10.3390/vaccines8020296)
Supplement: Supplementary file 1 [file vaccines-08-00296-s001.zip › Supplementary Table S5.pdf]

**Table S5.** Reproductive activity of H7N9 LAIV clinical isolates in developing chicken embryos at various incubation temperatures

| Isolate number                      | Day | Virus titer at specified temperature, log <sub>10</sub> EID <sub>50</sub> /mL |       |       | Difference in virus titers at optimal and suboptimal temperature, log <sub>10</sub> EID <sub>50</sub> /mL |               | Phenotype             |
|-------------------------------------|-----|-------------------------------------------------------------------------------|-------|-------|-----------------------------------------------------------------------------------------------------------|---------------|-----------------------|
|                                     |     | 32 °C                                                                         | 26 °C | 40 °C | 32 °C – 26 °C                                                                                             | 32 °C – 40 °C |                       |
| Vaccine virus isolation post–dose 1 |     |                                                                               |       |       |                                                                                                           |               |                       |
| 1                                   | 1   | 7.7                                                                           | 6.5   | ≤1.2  | 1.2                                                                                                       | ≥6.5          | <i>ts, ca</i>         |
| 2                                   | 1   | 8.0                                                                           | 6.5   | ≤1.2  | 1.5                                                                                                       | ≥6.8          | <i>ts, ca</i>         |
| 3                                   | 1   | 7.8                                                                           | 6.2   | ≤1.2  | 1.6                                                                                                       | ≥6.5          | <i>ts, ca</i>         |
| 4                                   | 1   | 7.2                                                                           | 5.8   | ≤1.2  | 1.4                                                                                                       | ≥6.0          | <i>ts, ca</i>         |
| 5                                   | 1   | 7.5                                                                           | 5.8   | ≤1.2  | 1.7                                                                                                       | ≥6.3          | <i>ts, ca</i>         |
| 6                                   | 1   | 7.2                                                                           | 5.7   | ≤1.2  | 1.5                                                                                                       | ≥6.0          | <i>ts, ca</i>         |
| 7                                   | 2   | 8.2                                                                           | 6.5   | ≤1.2  | 1.7                                                                                                       | ≥7.0          | <i>ts, ca</i>         |
| 8                                   | 2   | 7.8                                                                           | 6.3   | ≤1.2  | 1.5                                                                                                       | ≥6.6          | <i>ts, ca</i>         |
| 9                                   | 2   | 7.7                                                                           | 5.7   | ≤1.2  | 2.0                                                                                                       | ≥6.5          | <i>ts, ca</i>         |
| 10                                  | 2   | 7.2                                                                           | 5.8   | ≤1.2  | 1.4                                                                                                       | ≥6.0          | <i>ts, ca</i>         |
| 11                                  | 3   | 7.7                                                                           | 5.7   | ≤1.2  | 2.0                                                                                                       | ≥6.5          | <i>ts, ca</i>         |
| 12                                  | 3   | 6.9                                                                           | 5.7   | ≤1.2  | 1.2                                                                                                       | ≥5.7          | <i>ts, ca</i>         |
| 13                                  | 3   | 8.7                                                                           | 7.5   | 1.2   | 1.2                                                                                                       | 7.5           | <i>ts, ca</i>         |
| 14                                  | 3   | 7.6                                                                           | 6.2   | ≤1.2  | 1.4                                                                                                       | ≥6.4          | <i>ts, ca</i>         |
| 15                                  | 2   | 7.0                                                                           | 5.8   | ≤1.2  | 1.2                                                                                                       | ≥5.8          | <i>ts, ca</i>         |
| 16                                  | 3   | 7.4                                                                           | 6.2   | ≤1.2  | 1.2                                                                                                       | ≥6.2          | <i>ts, ca</i>         |
| 17                                  | 4   | 7.4                                                                           | 6.0   | ≤1.2  | 1.4                                                                                                       | ≥6.2          | <i>ts, ca</i>         |
| 18                                  | 4   | 9.2                                                                           | 7.4   | 1.2   | 1.8                                                                                                       | 8.0           | <i>ts, ca</i>         |
| 19                                  | 4   | 7.4                                                                           | 5.2   | 1.2   | 2.2                                                                                                       | 6.2           | <i>ts, ca</i>         |
| Vaccine virus isolation post–dose 2 |     |                                                                               |       |       |                                                                                                           |               |                       |
| 20                                  | 29  | 7.8                                                                           | 6.0   | ≤1.2  | 1.8                                                                                                       | ≥6.6          | <i>ts, ca</i>         |
| 21                                  | 30  | 8.4                                                                           | 7.2   | 1.2   | 1.2                                                                                                       | 7.2           | <i>ts, ca</i>         |
| 22                                  | 30  | 6.9                                                                           | 5.7   | ≤1.2  | 1.2                                                                                                       | ≥5.7          | <i>ts, ca</i>         |
| 23                                  | 31  | 8.2                                                                           | 7.0   | 1.2   | 1.2                                                                                                       | 7.0           | <i>ts, ca</i>         |
| 24                                  | 32  | 7.7                                                                           | 6.2   | ≤1.2  | 1.5                                                                                                       | ≥6.5          | <i>ts, ca</i>         |
| 25                                  | 32  | 7.7                                                                           | 6.5   | ≤1.2  | 1.2                                                                                                       | ≥6.5          | <i>ts, ca</i>         |
| Control viruses                     |     |                                                                               |       |       |                                                                                                           |               |                       |
| H7N9 WT                             |     | 8.7                                                                           | 1.5   | 9.0   | 7.2                                                                                                       | -0.3          | <i>non–ts, non–ca</i> |
| H7N9 LAIV                           |     | 9.7                                                                           | 7.7   | ≤1.2  | 2.0                                                                                                       | ≥8.5          | <i>ts, ca</i>         |
| L17 MDV                             |     | 8.0                                                                           | 6.7   | 1.2   | 1.3                                                                                                       | 6.8           | <i>ts, ca</i>         |
