# Supplementary material for: A Phase 1 Randomized Placebo-Controlled Study to Assess the Safety, Immunogenicity and Genetic Stability of a New Potential Pandemic H7N9 Live Attenuated Influenza Vaccine in Healthy Adults
Source: Vaccines (Basel). 2020 Jun 10;8(2):296. doi: 10.3390/vaccines8020296 (PMC7350028; doi:10.3390/vaccines8020296)
Supplement: Supplementary file 1 [file vaccines-08-00296-s001.zip › Supplementary Table S6.pdf]

**Table S6.** Antibody increases in volunteers after vaccination with H7N9 LAIV or placebo, as measured in different assays

| Time                     | Group   | n  | Number (%) of antibody responses |                            |              |              |                            |                             |
|--------------------------|---------|----|----------------------------------|----------------------------|--------------|--------------|----------------------------|-----------------------------|
|                          |         |    | Serum antibody                   |                            |              |              | Nasal sIgA                 | Total                       |
|                          |         |    | HAI                              | MN                         | IgA          | IgG          |                            |                             |
| After dose 1<br>(day 28) | LAIV    | 30 | 2<br>(6.7%)                      | 10<br>(33.3%)              | 0<br>(0.0%)  | 0<br>(0.0%)  | 13<br>(43.3%) <sup>1</sup> | 23<br>(76.7%) <sup>2</sup>  |
|                          | Placebo | 8  | 0                                | 0                          | 0            | 0            | 0 <sup>1</sup>             | 0 <sup>2</sup>              |
| After dose 2<br>(day 56) | LAIV    | 30 | 16<br>(53.3%) <sup>3</sup>       | 18<br>(60.0%) <sup>4</sup> | 4<br>(13.3%) | 3<br>(10.0%) | 18<br>(60.0%) <sup>5</sup> | 29<br>(96.7%) <sup>6</sup>  |
|                          | Placebo | 8  | 0 <sup>3</sup>                   | 0 <sup>4</sup>             | 0            | 0            | 0 <sup>5</sup>             | 0 <sup>6</sup>              |
| Total conversions        | LAIV    | 30 | 16<br>(53.3%) <sup>7</sup>       | 18<br>(60.0%) <sup>8</sup> | 4<br>(13.3%) | 3<br>(10.0%) | 19<br>(63.3%) <sup>9</sup> | 29<br>(96.7%) <sup>10</sup> |
|                          | Placebo | 8  | 0 <sup>7</sup>                   | 0 <sup>8</sup>             | 0            | 0            | 0 <sup>9</sup>             | 0 <sup>10</sup>             |

Fisher exact test, two-tailed: 1 – p = 0.0335; 2 – p = 0.0001; 3 – p = 0.0119; 4 – p = 0.0035; 5 – p = 0.0035; 6 – p < 0.0001; 7 – p = 0.0119; 8 – p = 0.0035; 9 – p = 0.0031; 10 – p < 0.0001.
